# Supplementary material
Source: ML conference proceedings conference paper supplement (https://openaccess.thecvf.com/content/CVPR_2020/html/Fan_Taking_a_Deeper_CVPR_2020_paper.html)
Supplement: Supplementary file 1 [file Fan_Taking_a_Deeper_CVPR_2020_supplemental.zip]

# Supplementary Material for Taking a Deeper Look at Co-Salient Object Detection

Deng-Ping Fan<sup>1,2,\*</sup> Zheng Lin<sup>1,\*</sup> Ge-Peng Ji<sup>3</sup> Dingwen Zhang<sup>4</sup> Huazhu Fu<sup>2</sup> Ming-Ming Cheng<sup>1</sup> ✉

<sup>1</sup> TKLNDST, College of CS, Nankai University <sup>2</sup> Inception Institute of Artificial Intelligence

<sup>3</sup> School of Computer Science, Wuhan University <sup>4</sup> Xidian University

(\* Equal contributions) <http://dpfan.net/CoSOD3k/>

## Abstract

In this supplementary material, we provide more details on our benchmark, datasets, metrics, and results.

- **Benchmark.** Here, we provide details on the motivation behind this benchmark.
- **Dataset.** We provide several important characteristics in terms of dataset comparisons, mixture-specific category masks, and quality control.
- **Metrics.** We provide the details of evaluation metrics including *S-measure* [5] ( $S_\alpha$ ), *max E-measure* [6] ( $E_\xi$ ), *max F-measure* [1] ( $F_\beta$ ), *MAE* [15] ( $M$ ), and *PR curve* [3].
- **Results.** We provide more qualitative comparisons on the proposed CoSOD3k. Five visual results of 10 state-of-the-art models are shown in Fig. 10~Fig. 14.

To promote growth in the co-salient object detection (CoSOD) community, we will make our benchmark toolbox and results publicly available upon publication.

## 1. Benchmark

Similar to RGB-D salient object detection (SOD) [7], co-salient object detection (CoSOD) also suffers from the similar limitations (convenience, sufficiency, completeness, and fairness) which is a big hindrance to this field.

**(a) Convenience.** The current CoSOD datasets have various input formats (e.g., \*.bmp, \*.png, \*.jpg), making it challenging to evaluate models. We provide a convenient benchmark toolbox to integrate various publicly available CoSOD datasets with uniform input/output formats (i.e., \*.jpg for image; \*.png for GT and predicted map).

**(b) Sufficiency.** In previous works [4, 10, 17, 18, 18], only a limited number of datasets (1~3) are evaluated. This prevents an accurate assessment of the generalization ability of

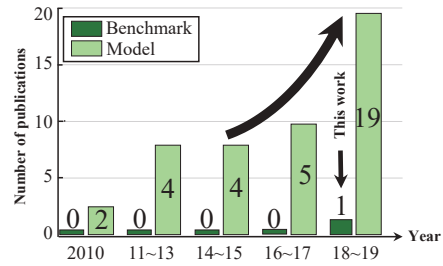

Figure 1: Statistics on the number of publications in different years. Note that the statistics only focus on top-tier conferences (e.g., CVPR, ICCV, AAAI, IJCAI, MM, etc) or journals (TPAMI, IJCV, TNNLS, TIP, etc).

models. We make the first attempt to assess the models on all existing datasets (Image Pair [11], MSRC [19], iCoSeg [2], and CoSal2015 [23]) as well as the proposed CoSOD3k.

**(c) Completeness.** F-measure, and MAE are two widely used metrics in previous model evaluations. As discussed in [14], these metrics have their inherent limitations. To provide thorough and reliable conclusions, we introduce two more accurate metrics (i.e., *S-measure* [5] and *E-measure* [6]).

**(d) Fairness.** To evaluate the F-measure, the first step is to binarize a saliency map into a set of foreground maps using different threshold values. There are many binarization strategies [3], such as adaptive threshold, fixed threshold and so on. Different strategies will result in different F-measure performances. In some previous works, they do not provide the details on the binarization strategy, easily resulting in inconsistent F-measures for different researchers.

**(e) Flourish.** As can be seen from the trend depicted in Fig. 1, the co-salient object detection task has been rapidly growing since 2018.

Based on the aforementioned reasons, we argue that integrating various publicly available CoSOD algorithms, datasets, and metrics, and then providing a complete benchmark, is highly desired. The 160 average performances of per sub-class are listed in Tab. 1, 2 & 3. The complete

evaluation results can be found in our [online benchmark](#).

## 2. Dataset

### 2.1. Dataset Comparison

As can be seen in Fig. 4, the proposed *CoSOD3k* is more challenging than previous datasets.

### 2.2. Mixture-specific Category Masks

In Fig. 8 & 9, we show the masks for 160 mixture-specific categories. It can be observed that some categories with unique shapes (e.g., airplane, zebra, and bicycle) often present shape-bias maps, while the categories with non-rigid or convex shapes (e.g., goldfish, bird, and bus) may have no clear shape-bias.

### 2.3. Quality Control

To provide high-quality annotations, we introduced a series of strict annotation guidelines during the labeling process. Examples of cases that either passed or were rejected are shown in Fig. 7.

## 3. Evaluation Metrics

### 3.1. Recently Released

**S-measure** [5] ( $S_\alpha$ ) was proposed by Fan *et al.* to evaluate the structure similarity between a saliency map ( $S_i$ ) and ground-truth ( $G_i$ ):

$$S_\alpha(S_i, G_i) = (1 - \alpha) * S_o(S_i, G_i) + \alpha * S_r(S_i, G_i), \quad (1)$$

where  $\alpha$  is a balance factor between the region-aware similarity  $S_r$  and object-aware similarity  $S_o$ . We use the default setting ( $\alpha=0.5$ ) as described in the original paper.

**E-measure** [6] ( $E_\xi$ ) is another recently released metric that evaluates both local and global similarity between the predicted map and ground-truth simultaneously. The formulation is defined as:

$$E_\xi(S_i, G_i) = \frac{1}{W \times H} \sum_{x=1}^W \sum_{y=1}^H \phi(S_i, G_i), \quad (2)$$

where  $W$  and  $H$  are the width and height of the ground-truth map, respectively.  $\phi(\cdot)$  is the enhanced alignment matrix described in [6].

### 3.2. Widely-Used

**Precision-Recall (PR) Curve** [3] is defined as:

$$Recall(t) = \frac{|S_i^t \cap G_i|}{|G_i|}, Precision(t) = \frac{|S_i^t \cap G_i|}{|S_i^t|}, \quad (3)$$

where  $S_i^t$  is a binarized foreground map after using a threshold  $t \in [0, 255]$ .  $|\cdot|$  is the total number of pixels. The PR curve can be plotted according to a 255 threshold  $t$ .

**F-measure** [1] ( $F_\beta$ ) is a widely used metric and is defined as:

$$F_\beta = \frac{(1 + \beta^2) Precision \cdot Recall}{\beta^2 \cdot Precision + Recall}, \quad (4)$$

where  $\beta^2$  is set to 0.3 as default. We compute a set of precisions and recalls using (Eq. 3) then plot the PR curve.

**MAE** [15] ( $M$ ) is defined as:

$$M = \frac{1}{N} |S_i - G_i|, \quad (5)$$

where  $N$  is the total number of pixels in  $G_i$ .

## 4. Experiment Results

In our *manuscript*, we present some experimental results for two groups of images. Here, we provide more comparison results (see Fig. 10~Fig. 14) on our *CoSOD3k*.

| <i>Mid-Class/Sub-class</i> | CBCS<br>[8] | CSHS<br>[13] | ESMG<br>[12] | CODR<br>[21] | DIM<br>[22] | UMLF<br>[9] | IML<br>[16] | CSMG<br>[24] | CPD<br>[20]  | EGNet<br>[25] |
|----------------------------|-------------|--------------|--------------|--------------|-------------|-------------|-------------|--------------|--------------|---------------|
| Animal/ant                 | 0.594       | 0.611        | 0.607        | 0.667        | 0.526       | 0.551       | 0.679       | 0.604        | 0.756        | <b>0.776</b>  |
| Animal/antelope            | 0.543       | 0.602        | 0.543        | 0.705        | 0.582       | 0.57        | 0.802       | 0.722        | 0.879        | <b>0.901</b>  |
| Animal/armadillo           | 0.532       | 0.548        | 0.565        | 0.652        | 0.538       | 0.704       | 0.855       | 0.81         | 0.904        | <b>0.916</b>  |
| Animal/bear                | 0.637       | 0.702        | 0.69         | 0.776        | 0.687       | 0.734       | 0.885       | 0.902        | <b>0.927</b> | 0.926         |
| Animal/bee                 | 0.489       | 0.489        | 0.594        | 0.547        | 0.468       | 0.555       | 0.575       | 0.574        | 0.647        | <b>0.7</b>    |
| Animal/bird                | 0.559       | 0.56         | 0.494        | 0.614        | 0.517       | 0.644       | 0.841       | 0.83         | <b>0.922</b> | 0.922         |
| Animal/butterfly           | 0.55        | 0.627        | 0.551        | 0.681        | 0.599       | 0.732       | 0.842       | 0.827        | <b>0.931</b> | 0.929         |
| Animal/camel               | 0.541       | 0.572        | 0.558        | 0.65         | 0.598       | 0.66        | 0.788       | 0.819        | 0.822        | <b>0.835</b>  |
| Animal/cattle              | 0.588       | 0.566        | 0.617        | 0.662        | 0.605       | 0.674       | 0.797       | 0.817        | <b>0.847</b> | 0.831         |
| Animal/centipede           | 0.546       | 0.52         | 0.493        | 0.559        | 0.499       | 0.501       | 0.659       | 0.631        | <b>0.718</b> | 0.718         |
| Animal/dog                 | 0.586       | 0.604        | 0.565        | 0.679        | 0.608       | 0.703       | 0.854       | 0.831        | <b>0.884</b> | 0.877         |
| Animal/domestic_cat        | 0.566       | 0.579        | 0.519        | 0.666        | 0.507       | 0.722       | 0.766       | 0.799        | <b>0.843</b> | 0.83          |
| Animal/dragonfly           | 0.492       | 0.523        | 0.472        | 0.666        | 0.537       | 0.618       | 0.701       | 0.659        | 0.736        | <b>0.75</b>   |
| Animal/elephant            | 0.481       | 0.654        | 0.603        | 0.753        | 0.593       | 0.725       | 0.854       | 0.865        | <b>0.882</b> | 0.858         |
| Animal/fox                 | 0.525       | 0.622        | 0.582        | 0.718        | 0.609       | 0.737       | 0.883       | 0.87         | 0.92         | <b>0.927</b>  |
| Animal/frog                | 0.535       | 0.584        | 0.532        | 0.707        | 0.593       | 0.691       | 0.848       | 0.794        | <b>0.877</b> | 0.874         |
| Animal/giant_panda         | 0.497       | 0.556        | 0.525        | 0.699        | 0.574       | 0.679       | 0.751       | 0.841        | 0.803        | <b>0.85</b>   |
| Animal/goldfish            | 0.573       | 0.634        | 0.633        | 0.698        | 0.619       | 0.593       | 0.776       | 0.671        | <b>0.783</b> | 0.777         |
| Animal/hamster             | 0.443       | 0.603        | 0.644        | 0.671        | 0.577       | 0.751       | 0.73        | 0.714        | 0.798        | <b>0.816</b>  |
| Animal/hippopotamus        | 0.511       | 0.617        | 0.548        | 0.722        | 0.589       | 0.686       | 0.812       | 0.855        | <b>0.894</b> | 0.891         |
| Animal/horse               | 0.511       | 0.516        | 0.5          | 0.651        | 0.552       | 0.633       | 0.777       | <b>0.827</b> | 0.806        | 0.795         |
| Animal/isopod              | 0.638       | 0.567        | 0.558        | 0.672        | 0.62        | 0.641       | 0.789       | 0.796        | 0.838        | <b>0.855</b>  |
| Animal/jellyfish           | 0.589       | 0.653        | 0.589        | 0.764        | 0.612       | 0.625       | 0.802       | 0.681        | 0.759        | <b>0.809</b>  |
| Animal/koala_bear          | 0.424       | 0.398        | 0.529        | 0.691        | 0.49        | 0.753       | 0.738       | 0.834        | <b>0.848</b> | 0.839         |
| Animal/ladybug             | 0.652       | 0.611        | 0.638        | 0.722        | 0.611       | 0.68        | 0.814       | 0.71         | 0.885        | <b>0.888</b>  |
| Animal/lion                | 0.47        | 0.567        | 0.51         | 0.626        | 0.621       | 0.718       | 0.848       | 0.864        | <b>0.894</b> | 0.883         |
| Animal/lizard              | 0.515       | 0.516        | 0.489        | 0.619        | 0.519       | 0.583       | 0.739       | 0.738        | 0.829        | <b>0.858</b>  |
| Animal/lobster             | 0.54        | 0.565        | 0.672        | 0.616        | 0.608       | 0.634       | 0.665       | 0.621        | <b>0.677</b> | 0.596         |
| Animal/monkey              | 0.562       | 0.577        | 0.536        | 0.66         | 0.578       | 0.72        | 0.829       | 0.839        | 0.869        | <b>0.879</b>  |
| Animal/otter               | 0.555       | 0.614        | 0.571        | 0.69         | 0.585       | 0.726       | 0.854       | 0.871        | <b>0.908</b> | 0.905         |
| Animal/person              | 0.494       | 0.527        | 0.461        | 0.572        | 0.439       | 0.622       | 0.644       | 0.752        | 0.736        | <b>0.756</b>  |
| Animal/porcupine           | 0.532       | 0.566        | 0.581        | 0.733        | 0.588       | 0.782       | 0.841       | 0.85         | 0.876        | <b>0.891</b>  |
| Animal/rabbit              | 0.559       | 0.701        | 0.714        | 0.734        | 0.664       | 0.762       | 0.876       | 0.864        | 0.896        | <b>0.902</b>  |
| Animal/ray                 | 0.601       | 0.637        | 0.503        | 0.693        | 0.573       | 0.703       | 0.854       | 0.808        | <b>0.89</b>  | 0.885         |
| Animal/red_panda           | 0.608       | 0.523        | 0.601        | 0.658        | 0.619       | 0.663       | 0.777       | 0.822        | <b>0.842</b> | 0.84          |
| Animal/scorpion            | 0.604       | 0.617        | 0.545        | 0.683        | 0.54        | 0.597       | 0.745       | 0.684        | 0.792        | <b>0.805</b>  |
| Animal/seal                | 0.564       | 0.623        | 0.642        | 0.694        | 0.603       | 0.651       | 0.811       | 0.853        | <b>0.894</b> | 0.861         |
| Animal/sheep               | 0.537       | 0.631        | 0.538        | 0.745        | 0.609       | 0.668       | 0.845       | 0.841        | 0.887        | <b>0.893</b>  |
| Animal/skunk               | 0.624       | 0.663        | 0.659        | 0.749        | 0.601       | 0.704       | 0.774       | 0.822        | 0.837        | <b>0.852</b>  |
| Animal/snail               | 0.596       | 0.663        | 0.636        | 0.76         | 0.654       | 0.736       | 0.82        | 0.754        | <b>0.883</b> | 0.874         |
| Animal/snake               | 0.498       | 0.519        | 0.491        | 0.605        | 0.493       | 0.53        | 0.698       | 0.676        | 0.815        | <b>0.846</b>  |
| Animal/squirrel            | 0.51        | 0.572        | 0.551        | 0.616        | 0.533       | 0.673       | 0.732       | 0.823        | 0.868        | <b>0.896</b>  |
| Animal/starfish            | 0.602       | 0.617        | 0.537        | 0.687        | 0.598       | 0.648       | 0.839       | 0.721        | 0.823        | <b>0.851</b>  |
| Animal/swine               | 0.491       | 0.626        | 0.55         | 0.75         | 0.591       | 0.745       | 0.855       | 0.878        | <b>0.923</b> | 0.916         |
| Animal/tick                | 0.65        | 0.701        | 0.648        | 0.741        | 0.622       | 0.614       | 0.839       | 0.703        | <b>0.88</b>  | 0.874         |
| Animal/tiger               | 0.494       | 0.594        | 0.567        | 0.672        | 0.59        | 0.693       | 0.826       | 0.808        | <b>0.871</b> | 0.854         |
| Animal/turtle              | 0.485       | 0.581        | 0.474        | 0.647        | 0.53        | 0.675       | 0.815       | 0.757        | <b>0.857</b> | 0.847         |
| Animal/whale               | 0.653       | 0.667        | 0.667        | 0.729        | 0.617       | 0.635       | 0.81        | 0.776        | 0.902        | <b>0.911</b>  |
| Animal/zebra               | 0.451       | 0.615        | 0.547        | 0.732        | 0.572       | 0.66        | 0.805       | 0.794        | 0.878        | <b>0.886</b>  |
| Ball/baseball              | 0.486       | 0.555        | 0.482        | 0.614        | 0.567       | 0.521       | 0.698       | 0.671        | 0.706        | <b>0.726</b>  |
| Ball/basketball            | 0.538       | 0.427        | 0.483        | 0.469        | 0.423       | 0.422       | 0.523       | <b>0.651</b> | 0.509        | 0.505         |
| Ball/croquet_ball          | 0.59        | 0.507        | 0.429        | 0.521        | 0.491       | 0.513       | 0.646       | 0.613        | <b>0.709</b> | 0.702         |
| Ball/golf_ball             | 0.613       | 0.715        | 0.575        | 0.768        | 0.599       | 0.78        | 0.869       | <b>0.911</b> | 0.893        | 0.909         |
| Ball/rugby_ball            | 0.493       | 0.547        | 0.466        | 0.574        | 0.517       | 0.622       | 0.654       | <b>0.741</b> | 0.658        | 0.674         |
| Ball/soccer_ball           | 0.552       | 0.511        | 0.481        | 0.584        | 0.505       | 0.595       | 0.633       | <b>0.75</b>  | 0.641        | 0.64          |
| Ball/tennis_ball           | 0.604       | 0.415        | 0.429        | 0.489        | 0.505       | 0.516       | 0.627       | <b>0.659</b> | 0.618        | 0.623         |

Table 1: **Results of Structure-measure [5] ( $S_\alpha$ ) for each sub-class in our *CoSOD3k* dataset (1/3).** The highest score of each subclass is marked in **bold**.

| <i>Sub-class</i>            | CBCS<br>[8]  | CSHS<br>[13] | ESMG<br>[12] | CODR<br>[21] | DIM<br>[22] | UMLF<br>[9]  | IML<br>[16]  | CSMG<br>[24] | CPD<br>[20]  | EGNet<br>[25] |
|-----------------------------|--------------|--------------|--------------|--------------|-------------|--------------|--------------|--------------|--------------|---------------|
| Nece/bow_tie                | <b>0.472</b> | 0.438        | 0.441        | 0.454        | 0.401       | 0.443        | 0.44         | 0.375        | 0.39         | 0.425         |
| Nece/brassiere              | <b>0.638</b> | 0.535        | 0.535        | 0.565        | 0.575       | 0.542        | 0.58         | 0.572        | 0.548        | 0.558         |
| Nece/cream                  | 0.444        | 0.497        | 0.349        | 0.617        | 0.578       | 0.713        | 0.733        | 0.71         | 0.806        | <b>0.817</b>  |
| Cosm/face_powder            | 0.481        | 0.643        | 0.5          | 0.633        | 0.601       | 0.72         | 0.74         | 0.62         | <b>0.749</b> | 0.736         |
| Cosm/hair_spray             | 0.529        | 0.534        | 0.433        | 0.611        | 0.553       | 0.566        | 0.649        | 0.668        | 0.706        | <b>0.728</b>  |
| Cosm/lipstick               | 0.544        | 0.583        | 0.533        | 0.633        | 0.591       | 0.592        | 0.716        | 0.592        | 0.79         | <b>0.817</b>  |
| Cosm/perfume                | 0.464        | 0.516        | 0.469        | 0.532        | 0.376       | 0.584        | <b>0.657</b> | 0.649        | 0.632        | 0.631         |
| Elec/computer_keyboard      | 0.438        | 0.555        | 0.535        | 0.605        | 0.526       | 0.592        | 0.552        | <b>0.807</b> | 0.581        | 0.607         |
| Elec/computer_mouse         | 0.487        | 0.482        | 0.47         | 0.528        | 0.451       | 0.543        | 0.627        | 0.725        | 0.734        | <b>0.738</b>  |
| Elec/electric_fan           | 0.456        | 0.565        | 0.502        | 0.651        | 0.568       | 0.752        | 0.798        | 0.765        | <b>0.858</b> | 0.831         |
| Elec/hair_dryer             | 0.554        | 0.499        | 0.462        | 0.56         | 0.511       | 0.559        | 0.622        | <b>0.647</b> | 0.633        | 0.634         |
| Elec/iPod                   | 0.57         | 0.641        | 0.494        | 0.713        | 0.573       | 0.736        | 0.785        | 0.735        | <b>0.882</b> | 0.862         |
| Elec/lamp                   | 0.619        | 0.592        | 0.537        | 0.609        | 0.562       | 0.592        | 0.741        | 0.605        | <b>0.775</b> | 0.766         |
| Elec/laptop                 | 0.559        | 0.541        | 0.539        | 0.501        | 0.583       | 0.539        | 0.609        | <b>0.738</b> | 0.687        | 0.691         |
| Elec/remote_control         | 0.457        | 0.597        | 0.576        | 0.633        | 0.526       | 0.607        | 0.668        | 0.706        | 0.703        | <b>0.739</b>  |
| Elec/tape_player            | 0.461        | 0.684        | 0.525        | 0.742        | 0.604       | 0.787        | 0.791        | 0.8          | <b>0.848</b> | 0.811         |
| Food/bagel                  | 0.449        | 0.47         | 0.637        | 0.685        | 0.68        | 0.741        | 0.719        | <b>0.803</b> | 0.769        | 0.797         |
| Food/hamburger              | 0.557        | 0.675        | 0.662        | 0.747        | 0.683       | 0.77         | 0.791        | <b>0.87</b>  | 0.836        | 0.858         |
| Food/pizza                  | 0.384        | 0.574        | 0.481        | 0.692        | 0.647       | 0.779        | 0.727        | <b>0.805</b> | 0.795        | 0.745         |
| Food/popsicle               | 0.623        | 0.476        | 0.465        | 0.497        | 0.496       | 0.498        | 0.545        | <b>0.626</b> | 0.525        | 0.573         |
| Food/pretzel                | 0.465        | 0.55         | 0.521        | 0.608        | 0.625       | 0.655        | 0.683        | <b>0.764</b> | 0.735        | 0.756         |
| Fruit/apple                 | 0.657        | 0.674        | 0.739        | 0.769        | 0.71        | 0.753        | 0.799        | <b>0.875</b> | 0.84         | 0.844         |
| Fruit/banana                | 0.573        | 0.525        | 0.635        | 0.612        | 0.578       | 0.637        | 0.712        | <b>0.752</b> | 0.717        | 0.731         |
| Fruit/cucumber              | 0.564        | 0.612        | 0.68         | 0.613        | 0.535       | 0.594        | 0.611        | <b>0.713</b> | 0.674        | 0.65          |
| Fruit/fig                   | 0.532        | 0.657        | 0.488        | 0.729        | 0.588       | 0.751        | 0.864        | 0.802        | <b>0.914</b> | 0.909         |
| Fruit/lemon                 | 0.622        | 0.702        | 0.743        | 0.728        | 0.75        | 0.724        | 0.798        | 0.803        | <b>0.865</b> | 0.85          |
| Fruit/orange                | 0.697        | 0.815        | 0.82         | 0.85         | 0.861       | 0.88         | <b>0.936</b> | 0.877        | 0.912        | 0.924         |
| Fruit/pineapple             | 0.486        | 0.504        | 0.517        | 0.572        | 0.588       | 0.599        | 0.715        | 0.635        | 0.748        | <b>0.765</b>  |
| Fruit/pomegranate           | 0.595        | 0.626        | 0.521        | 0.682        | 0.695       | 0.727        | 0.801        | 0.718        | 0.833        | <b>0.856</b>  |
| Fruit/strawberry            | 0.696        | 0.599        | 0.698        | <b>0.706</b> | 0.656       | 0.614        | 0.627        | 0.634        | 0.586        | 0.596         |
| Inst/banjo                  | 0.482        | 0.442        | 0.486        | 0.523        | 0.438       | 0.509        | <b>0.58</b>  | 0.566        | 0.502        | 0.511         |
| Inst/cello                  | 0.535        | 0.496        | 0.613        | 0.547        | 0.54        | 0.412        | 0.616        | <b>0.638</b> | 0.525        | 0.612         |
| Inst/chime                  | 0.491        | 0.497        | 0.49         | 0.593        | 0.461       | 0.638        | 0.687        | 0.732        | 0.763        | <b>0.796</b>  |
| Inst/drum                   | 0.485        | 0.508        | 0.542        | 0.525        | 0.569       | 0.526        | <b>0.634</b> | 0.62         | 0.557        | 0.559         |
| Inst/flute                  | <b>0.465</b> | 0.44         | 0.464        | 0.451        | 0.422       | 0.389        | 0.434        | 0.434        | 0.391        | 0.419         |
| Inst/french_horn            | 0.531        | 0.509        | 0.522        | 0.585        | 0.63        | 0.72         | <b>0.795</b> | 0.701        | 0.633        | 0.7           |
| Inst/guitar                 | 0.526        | 0.481        | 0.441        | 0.571        | 0.557       | 0.579        | <b>0.679</b> | 0.566        | 0.608        | 0.644         |
| Inst/harmonica              | 0.445        | 0.554        | 0.473        | 0.58         | 0.471       | 0.591        | 0.584        | <b>0.672</b> | 0.563        | 0.567         |
| Inst/harp                   | 0.488        | 0.555        | 0.613        | 0.626        | 0.54        | <b>0.629</b> | 0.626        | 0.603        | 0.547        | 0.484         |
| Inst/maraca                 | 0.542        | 0.643        | 0.566        | 0.726        | 0.658       | 0.694        | 0.807        | 0.675        | 0.845        | <b>0.852</b>  |
| Inst/oboe                   | 0.535        | 0.536        | 0.574        | 0.586        | 0.527       | 0.447        | <b>0.591</b> | 0.552        | 0.577        | 0.57          |
| Inst/piano                  | 0.655        | 0.678        | 0.7          | 0.599        | 0.639       | 0.676        | <b>0.86</b>  | 0.727        | 0.798        | 0.769         |
| Inst/trumpet                | 0.497        | 0.518        | 0.512        | 0.559        | 0.482       | 0.465        | 0.633        | 0.491        | 0.647        | <b>0.664</b>  |
| Inst/violin                 | 0.546        | 0.637        | 0.628        | 0.592        | 0.617       | 0.556        | <b>0.651</b> | 0.592        | 0.599        | 0.55          |
| Kitch/bowl                  | 0.547        | 0.502        | 0.39         | 0.569        | 0.488       | 0.804        | 0.886        | 0.9          | <b>0.928</b> | 0.928         |
| Kitch/frying_pan            | 0.519        | 0.542        | 0.59         | 0.645        | 0.606       | 0.646        | <b>0.8</b>   | 0.676        | 0.794        | 0.768         |
| Kitch/microwave             | 0.571        | 0.555        | 0.544        | 0.509        | 0.485       | 0.605        | 0.612        | <b>0.867</b> | 0.724        | 0.73          |
| Kitch/refrigerator          | 0.416        | 0.432        | 0.362        | 0.483        | 0.402       | 0.555        | 0.495        | <b>0.785</b> | 0.649        | 0.642         |
| Kitch/salt_or_pepper_shaker | 0.536        | 0.65         | 0.475        | 0.711        | 0.547       | 0.772        | 0.85         | 0.781        | <b>0.911</b> | 0.909         |
| Kitch/spatula               | 0.575        | 0.623        | 0.606        | 0.638        | 0.521       | 0.578        | 0.767        | 0.625        | 0.775        | <b>0.826</b>  |
| Kitch/strainer              | 0.476        | 0.576        | 0.518        | 0.659        | 0.538       | 0.647        | <b>0.75</b>  | 0.615        | 0.714        | 0.728         |
| Kitch/toaster               | 0.483        | 0.636        | 0.482        | 0.643        | 0.603       | 0.703        | 0.776        | 0.811        | <b>0.866</b> | 0.843         |
| Kitch/washer                | 0.422        | 0.473        | 0.458        | 0.65         | 0.563       | 0.725        | 0.605        | 0.698        | 0.806        | <b>0.825</b>  |
| Nece/band_aid               | 0.577        | 0.492        | 0.465        | 0.577        | 0.511       | 0.535        | 0.568        | 0.579        | 0.614        | <b>0.645</b>  |
| Nece/beaker                 | 0.414        | 0.487        | 0.377        | 0.53         | 0.488       | 0.678        | 0.687        | 0.633        | 0.761        | <b>0.788</b>  |

Table 2: **Results of Structure-measure [5] ( $S_\alpha$ ) for each sub-class in our *CoSOD3k* dataset (2/3).** The highest score of each subclass is marked in **bold**.



| <i>Sub-class</i>           | CBCS<br>[8] | CSHS<br>[13] | ESMG<br>[12] | CODR<br>[21] | DIM<br>[22] | UMLF<br>[9]  | IML<br>[16]  | CSMG<br>[24] | CPD<br>[20]  | EGNet<br>[25] |
|----------------------------|-------------|--------------|--------------|--------------|-------------|--------------|--------------|--------------|--------------|---------------|
| Nece/cup_or_mug            | 0.477       | 0.513        | 0.41         | 0.573        | 0.494       | 0.676        | 0.709        | 0.674        | <b>0.795</b> | 0.773         |
| Nece/digital_clock         | 0.644       | 0.725        | 0.671        | 0.709        | 0.676       | 0.736        | 0.769        | 0.813        | 0.831        | <b>0.853</b>  |
| Nece/milk_can              | 0.503       | 0.603        | 0.518        | 0.572        | 0.512       | 0.76         | 0.776        | 0.829        | <b>0.887</b> | 0.874         |
| Nece/pitcher               | 0.485       | 0.595        | 0.521        | 0.658        | 0.577       | 0.719        | 0.8          | 0.829        | <b>0.867</b> | 0.854         |
| Nece/soap_dispenser        | 0.529       | 0.528        | 0.429        | 0.599        | 0.585       | 0.685        | 0.741        | 0.644        | 0.766        | <b>0.773</b>  |
| Nece/water_bottle          | 0.498       | 0.469        | 0.392        | 0.561        | 0.518       | 0.633        | 0.696        | 0.701        | 0.746        | <b>0.772</b>  |
| Nece/wine_bottle           | 0.396       | 0.477        | 0.392        | 0.62         | 0.493       | 0.659        | 0.663        | 0.631        | <b>0.779</b> | 0.752         |
| Other/baby_bed             | 0.471       | 0.529        | 0.454        | 0.614        | 0.557       | 0.677        | <b>0.747</b> | 0.728        | 0.709        | 0.736         |
| Other/bench                | 0.462       | 0.536        | 0.491        | 0.612        | 0.45        | 0.551        | 0.626        | <b>0.716</b> | 0.671        | 0.636         |
| Other/binder               | 0.587       | 0.678        | 0.475        | 0.585        | 0.587       | 0.606        | 0.648        | 0.533        | 0.65         | <b>0.715</b>  |
| Other/bookshelf            | 0.369       | 0.463        | 0.416        | 0.603        | 0.529       | <b>0.668</b> | 0.551        | 0.506        | 0.575        | 0.583         |
| Other/crutch               | 0.464       | 0.487        | 0.449        | 0.526        | 0.407       | 0.409        | 0.54         | 0.486        | 0.598        | <b>0.615</b>  |
| Other/dumbbell             | 0.453       | 0.461        | 0.474        | 0.506        | 0.478       | 0.436        | <b>0.541</b> | 0.523        | 0.508        | 0.509         |
| Other/flower_pot           | 0.547       | 0.564        | 0.544        | 0.54         | 0.591       | 0.524        | 0.596        | <b>0.658</b> | 0.629        | 0.618         |
| Other/hat_with_a_wide_brim | 0.504       | 0.469        | 0.441        | 0.526        | 0.503       | 0.55         | <b>0.6</b>   | 0.561        | 0.563        | 0.554         |
| Other/pencil_box           | 0.445       | 0.716        | 0.572        | 0.781        | 0.652       | 0.819        | 0.766        | 0.603        | <b>0.926</b> | 0.904         |
| Other/punching_bag         | 0.477       | 0.437        | 0.522        | 0.604        | 0.444       | 0.605        | 0.638        | 0.714        | 0.737        | <b>0.753</b>  |
| Other/purse                | 0.522       | 0.54         | 0.415        | 0.72         | 0.586       | 0.719        | 0.785        | 0.756        | <b>0.817</b> | 0.814         |
| Other/rubber_eraser        | 0.547       | 0.513        | 0.564        | 0.585        | 0.553       | 0.534        | 0.637        | 0.622        | 0.674        | <b>0.718</b>  |
| Other/sofa                 | 0.526       | 0.284        | 0.455        | 0.356        | 0.486       | 0.558        | 0.632        | <b>0.791</b> | 0.662        | 0.648         |
| Other/stethoscope          | 0.55        | <b>0.58</b>  | 0.533        | 0.519        | 0.529       | 0.375        | 0.527        | 0.499        | 0.496        | 0.532         |
| Other/syringe              | 0.466       | 0.485        | 0.451        | 0.531        | 0.412       | 0.418        | 0.575        | 0.606        | 0.626        | <b>0.636</b>  |
| Other/tie                  | 0.51        | 0.448        | 0.433        | 0.46         | 0.439       | 0.484        | <b>0.538</b> | 0.461        | 0.474        | 0.52          |
| Other/traffic_light        | 0.567       | 0.581        | 0.58         | 0.673        | 0.594       | 0.563        | 0.647        | <b>0.719</b> | 0.718        | 0.719         |
| Tool/axe                   | 0.484       | 0.429        | 0.438        | 0.489        | 0.426       | 0.442        | 0.543        | 0.549        | 0.566        | <b>0.571</b>  |
| Tool/bow                   | 0.563       | 0.566        | 0.581        | 0.552        | 0.495       | 0.36         | 0.574        | 0.53         | <b>0.603</b> | 0.586         |
| Tool/can_opener            | 0.619       | 0.745        | 0.644        | 0.789        | 0.689       | 0.758        | 0.835        | 0.698        | <b>0.894</b> | 0.892         |
| Tool/chain_saw             | 0.591       | 0.568        | 0.554        | 0.564        | 0.569       | 0.518        | <b>0.636</b> | 0.6          | 0.631        | 0.618         |
| Tool/cocktail_shaker       | 0.449       | 0.663        | 0.506        | 0.768        | 0.595       | 0.707        | 0.783        | 0.742        | <b>0.83</b>  | 0.829         |
| Tool/hammer                | 0.503       | 0.463        | 0.483        | 0.595        | 0.538       | 0.474        | 0.655        | 0.582        | 0.687        | <b>0.699</b>  |
| Tool/helmet                | 0.49        | 0.485        | 0.485        | 0.468        | 0.485       | 0.444        | <b>0.611</b> | 0.463        | 0.598        | 0.584         |
| Tool/nail                  | 0.473       | 0.522        | 0.449        | 0.502        | 0.458       | 0.452        | 0.64         | 0.543        | <b>0.784</b> | 0.78          |
| Tool/power_drill           | 0.516       | 0.556        | 0.507        | 0.578        | 0.546       | 0.57         | 0.684        | 0.633        | 0.674        | <b>0.739</b>  |
| Tool/screwdriver           | 0.543       | 0.484        | 0.487        | 0.548        | 0.458       | 0.441        | 0.592        | 0.6          | 0.607        | <b>0.66</b>   |
| Tool/snowplow              | 0.521       | 0.637        | 0.556        | 0.692        | 0.662       | 0.705        | 0.825        | 0.799        | <b>0.88</b>  | 0.869         |
| Traf/airplane              | 0.568       | 0.628        | 0.561        | 0.713        | 0.579       | 0.647        | 0.863        | 0.827        | <b>0.918</b> | 0.911         |
| Traf/bicycle               | 0.471       | 0.51         | 0.498        | 0.572        | 0.51        | 0.544        | 0.6          | <b>0.681</b> | 0.665        | 0.647         |
| Traf/bus                   | 0.499       | 0.586        | 0.464        | 0.729        | 0.642       | 0.784        | 0.828        | 0.868        | <b>0.895</b> | 0.879         |
| Traf/car                   | 0.523       | 0.574        | 0.421        | 0.678        | 0.573       | 0.705        | 0.832        | 0.786        | 0.905        | <b>0.914</b>  |
| Traf/cart                  | 0.521       | 0.502        | 0.536        | 0.495        | 0.575       | 0.607        | 0.633        | 0.586        | <b>0.669</b> | 0.622         |
| Traf/golfcart              | 0.455       | 0.557        | 0.534        | 0.669        | 0.538       | 0.741        | 0.791        | 0.76         | <b>0.873</b> | 0.853         |
| Traf/motorcycle            | 0.431       | 0.543        | 0.509        | 0.638        | 0.547       | 0.657        | 0.727        | 0.776        | <b>0.802</b> | 0.767         |
| Traf/snowmobile            | 0.568       | 0.615        | 0.55         | 0.638        | 0.575       | 0.629        | 0.741        | 0.734        | <b>0.845</b> | 0.829         |
| Traf/train                 | 0.517       | 0.602        | 0.605        | 0.639        | 0.567       | 0.732        | 0.786        | <b>0.893</b> | 0.838        | 0.823         |
| Traf/watercraft            | 0.567       | 0.629        | 0.587        | 0.717        | 0.584       | 0.644        | 0.818        | 0.786        | 0.826        | <b>0.841</b>  |
| Vege/artichoke             | 0.485       | 0.6          | 0.467        | 0.603        | 0.599       | 0.703        | 0.79         | 0.638        | 0.782        | <b>0.792</b>  |
| Vege/bell_pepper           | 0.625       | 0.471        | 0.495        | 0.62         | 0.572       | 0.732        | 0.786        | 0.782        | 0.87         | <b>0.883</b>  |
| Vege/head_cabbage          | 0.317       | 0.315        | 0.311        | 0.575        | 0.475       | 0.609        | <b>0.626</b> | 0.368        | 0.558        | 0.609         |
| Vege/mushroom              | 0.62        | 0.696        | 0.679        | 0.728        | 0.727       | 0.799        | 0.865        | 0.79         | 0.867        | <b>0.895</b>  |
| <b>Overall</b>             | 0.525       | 0.560        | 0.520        | 0.623        | 0.561       | 0.642        | 0.714        | 0.700        | 0.752        | 0.758         |
| <b>Ranking</b>             | 9           | 8            | 10           | 6            | 7           | 5            | 3            | 4            | 2            | 1             |

Table 3: **Results of Structure-measure [5] ( $S_\alpha$ ) for each sub-class in our *CoSOD3k* dataset (3/3).** The highest score of each subclass is marked in **bold**. The overall score is based on 160 sub-classes.

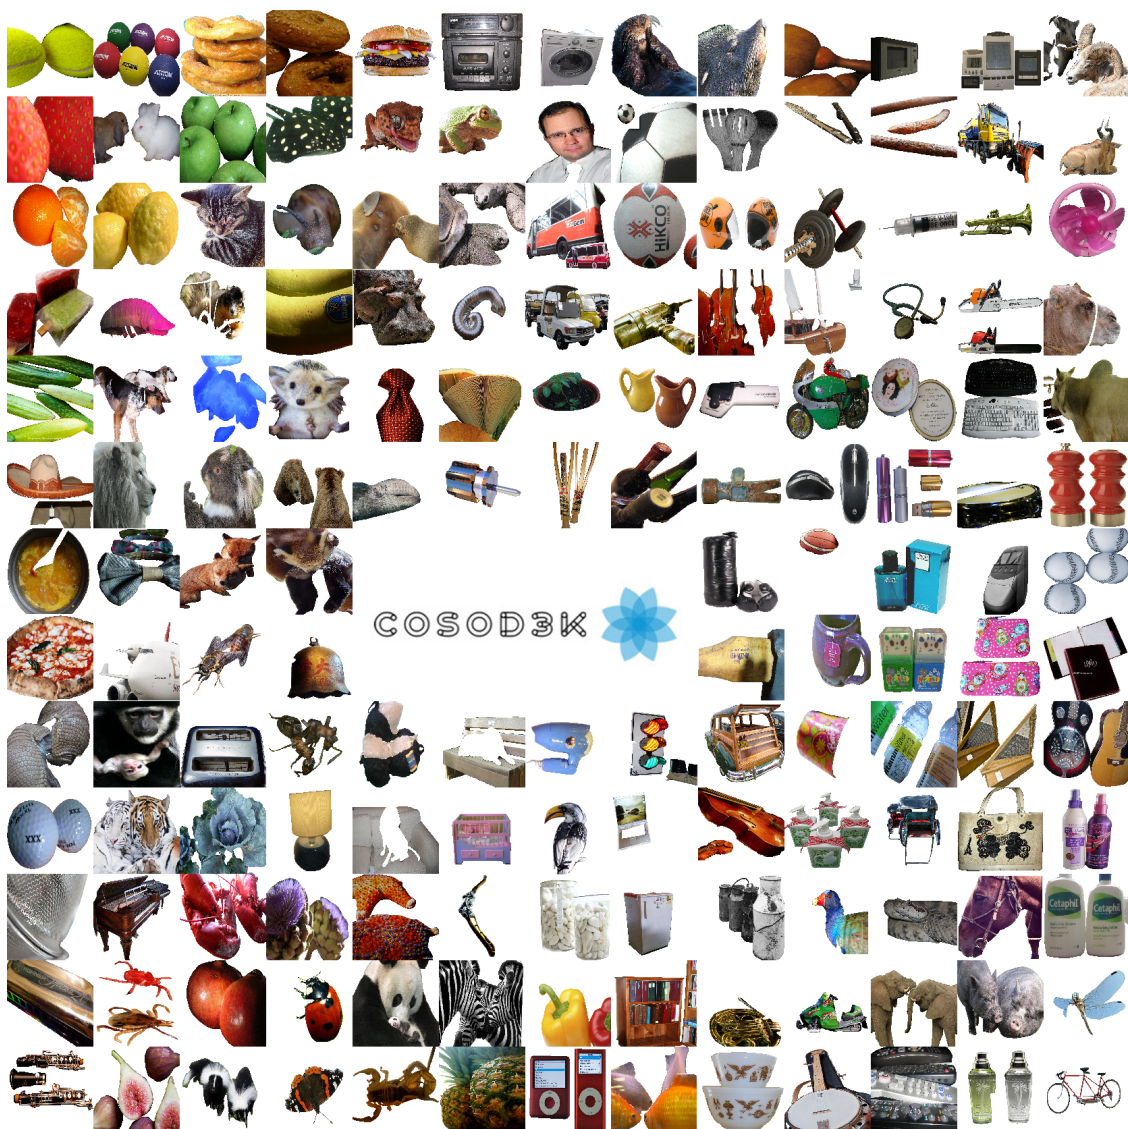

Figure 2: Objects from our *CoSOD3k*. Each object is sampled per sub-class (Fig. 3).

|                   |                       |               |             |               |                      |              |                |              |                 |
|-------------------|-----------------------|---------------|-------------|---------------|----------------------|--------------|----------------|--------------|-----------------|
| ant               | antelope              | armadillo     | bear        | bee           | bird                 | butterfly    | camel          | cattle       | centipede       |
| dog               | domestic_cat          | dragonfly     | elephant    | fox           | frog                 | giant_panda  | goldfish       | hamster      | hippopotamus    |
| horse             | isopod                | jellyfish     | koala_bear  | ladybug       | lion                 | lizard       | lobster        | monkey       | otter           |
| person            | porcupine             | rabbit        | ray         | red_panda     | scorpion             | seal         | sheep          | skunk        | snail           |
| snake             | squirrel              | starfish      | swine       | tick          | tiger                | turtle       | whale          | zebra        | baseball        |
| basketball        | croquet_ball          | golf_ball     | rugby_ball  | soccer_ball   | tennis_ball          | face_powder  | hair_spray     | lipstick     | perfume         |
| computer_keyboard | computer_mouse        | electric_fan  | hair_dryer  | iPod          | lamp                 | laptop       | remote_control | tape_player  | bagel           |
| hamburger         | pizza                 | popsicle      | pretzel     | apple         | banana               | cucumber     | fig            | lemon        | orange          |
| pineapple         | pomegranate           | strawberry    | banjo       | cello         | chime                | drum         | flute          | french_horn  | guitar          |
| harmonica         | harp                  | maraca        | oboe        | piano         | trumpet              | violin       | bowl           | frying_pan   | microwave       |
| refrigerator      | salt_or_pepper_shaker | spatula       | strainer    | toaster       | washer               | band_aid     | beaker         | bow_tie      | brassiere       |
| cream             | cup_or_mug            | digital_clock | milk_can    | pitcher       | soap_dispenser       | water_bottle | wine_bottle    | baby_bed     | bench           |
| binder            | bookshelf             | crutch        | dumbbell    | flower_pot    | hat_with_a_wide_brim | pencil_box   | punching_bag   | purse        | rubber_eraser   |
| sofa              | stethoscope           | syringe       | tie         | traffic_light | axe                  | bow          | can_opener     | chain_saw    | cocktail_shaker |
| hammer            | helmet                | nail          | power_drill | screwdriver   | snowplow             | airplane     | bicycle        | bus          | car             |
| cart              | golfcart              | motorcycle    | snowmobile  | train         | watercraft           | artichoke    | bell_pepper    | head_cabbage | mushroom        |

Figure 3: The 160 sub-classes of our *CoSOD3k*.

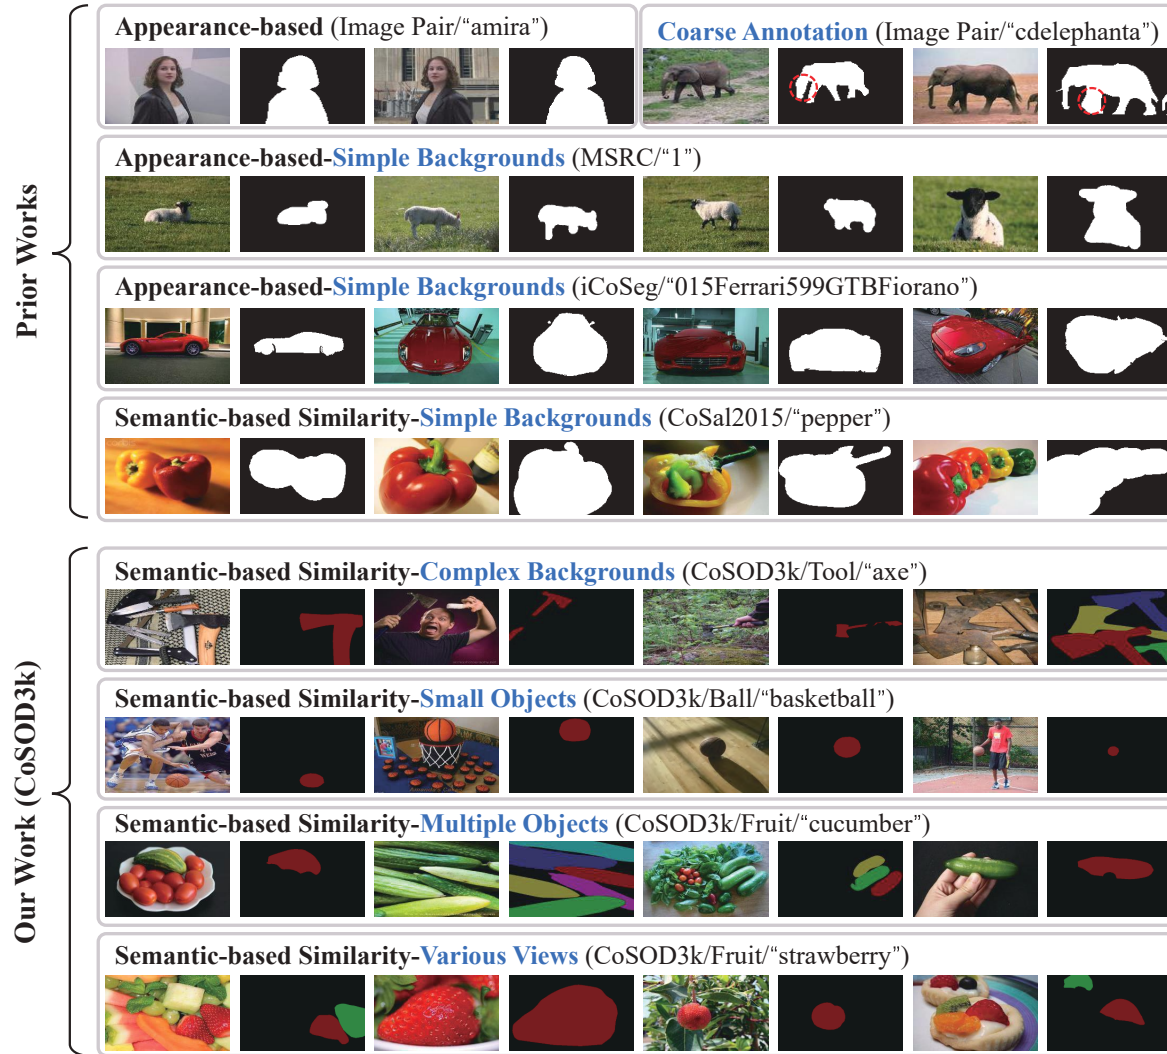

Figure 4: Examples of image groups from the existing datasets and the proposed *CoSOD3k*. Different from previous works (e.g., appearance-aware or semantic-aware with simple backgrounds), the image group contained in our *CoSOD3k* are semantic-aware with complex backgrounds, small objects, multiple objects and various views.

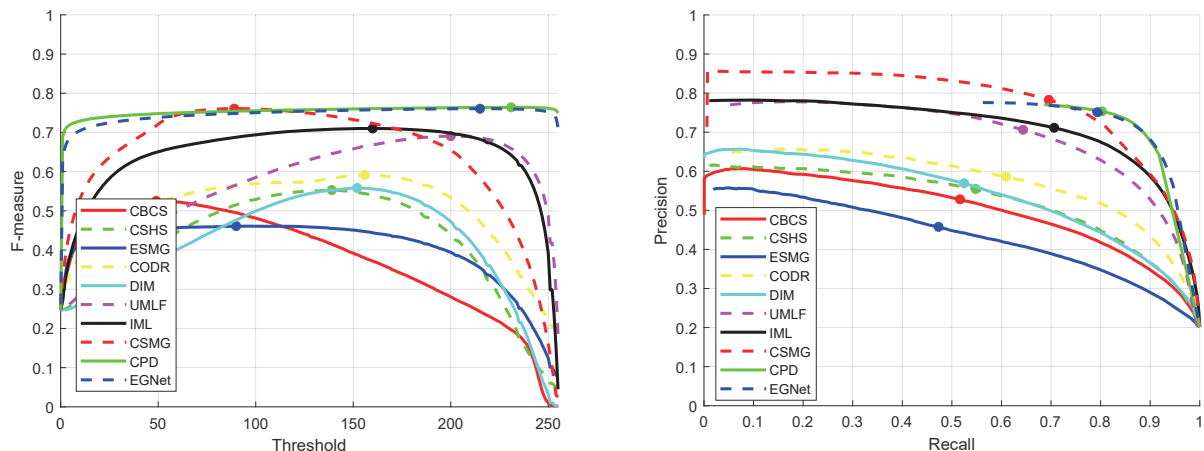

Figure 5: F-measure (Left) and PR curve (Right) under different thresholds  $t$  on the proposed *CoSOD3k* dataset.



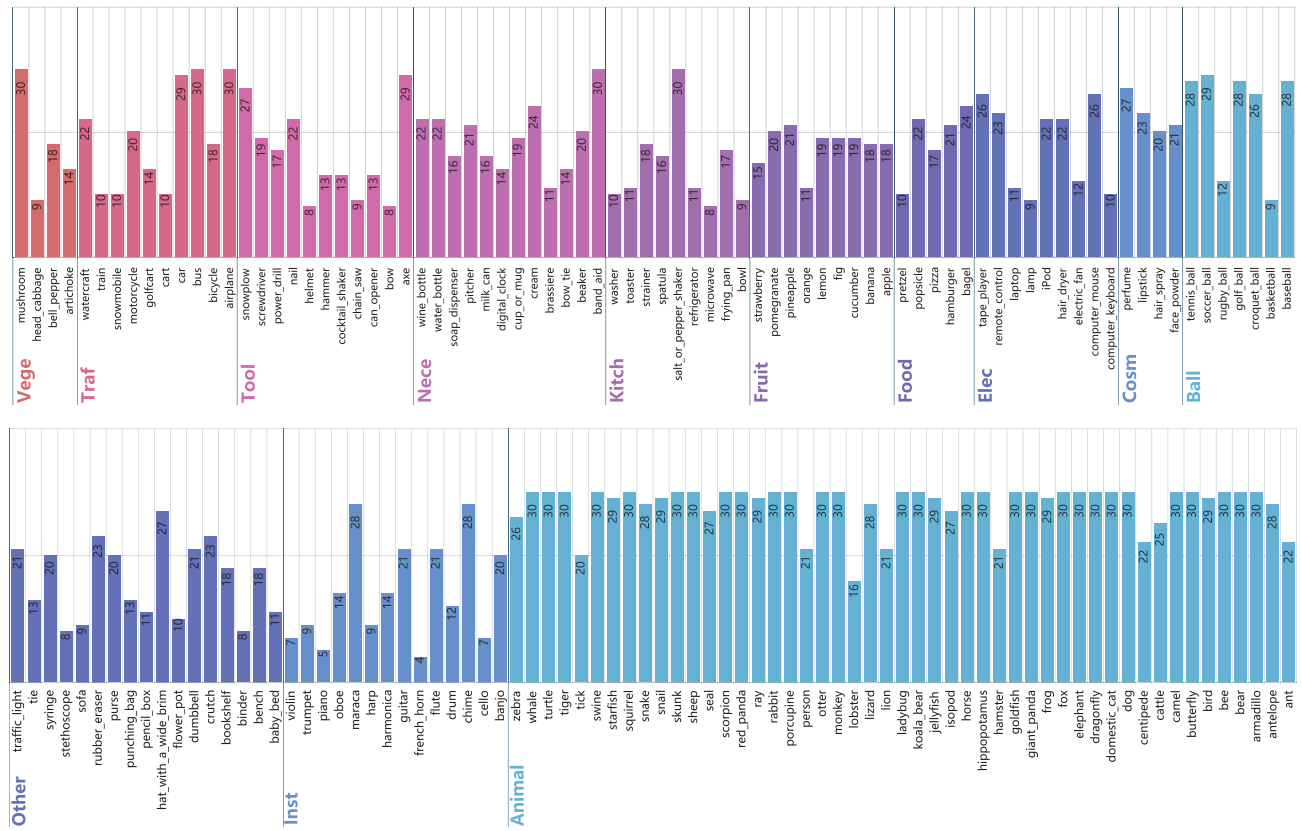

Figure 6: Number of images in 160 sup-classes.

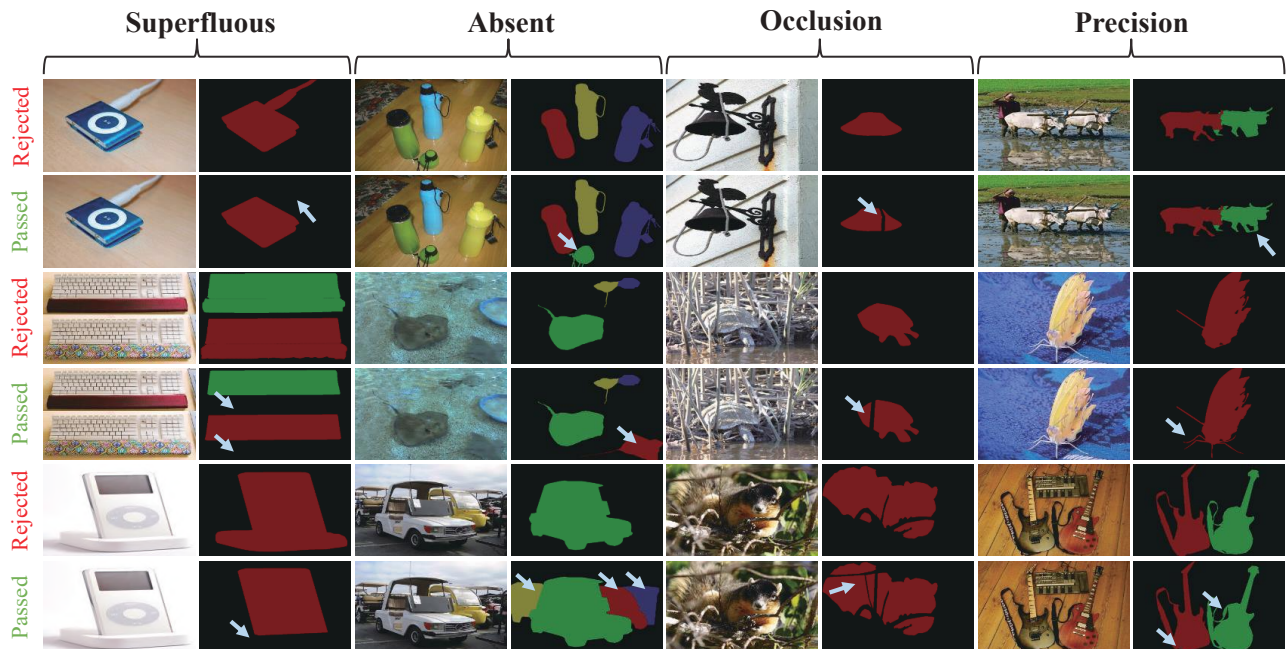

Figure 7: Some passed and rejected cases (e.g., superfluous, absent, occlusion, precision) in our *CoSOD3k*.

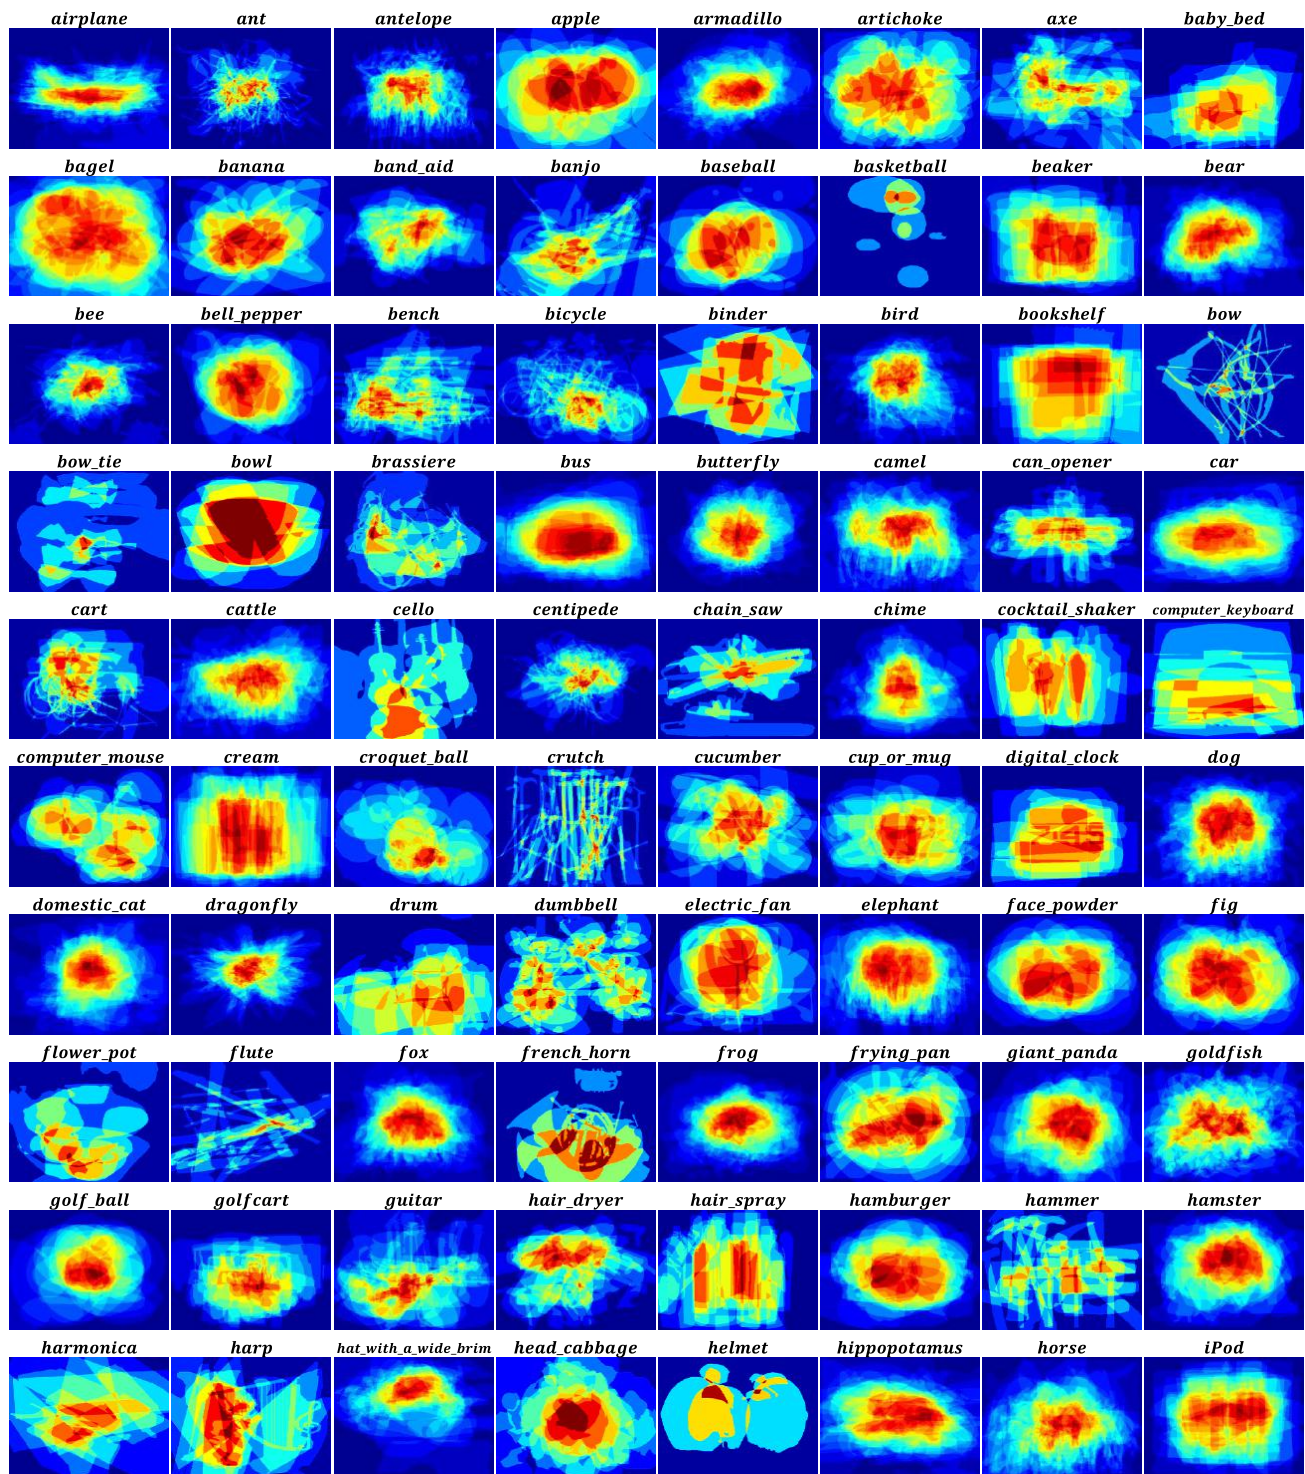

Figure 8: Visualization of overlap masks for 160 mixture-specific categories (1/2).



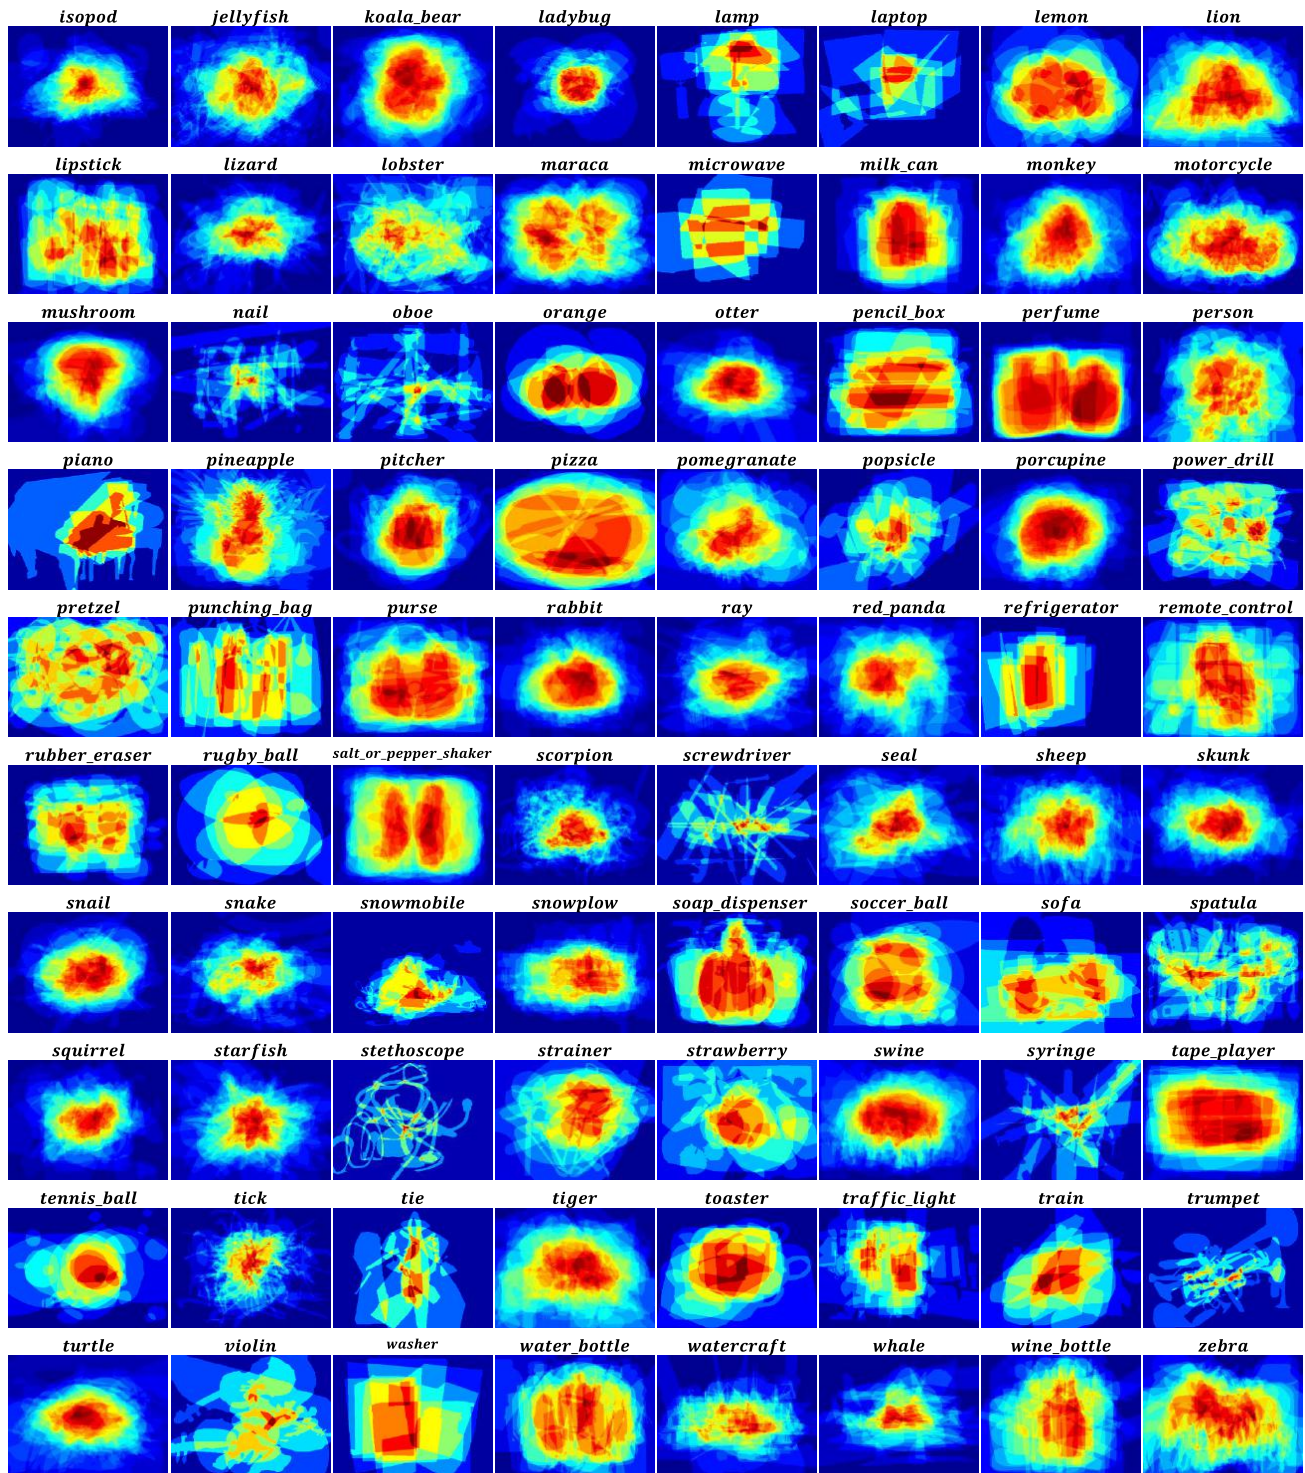

Figure 9: Visualization of overlap masks for 160 mixture-specific categories (2/2).



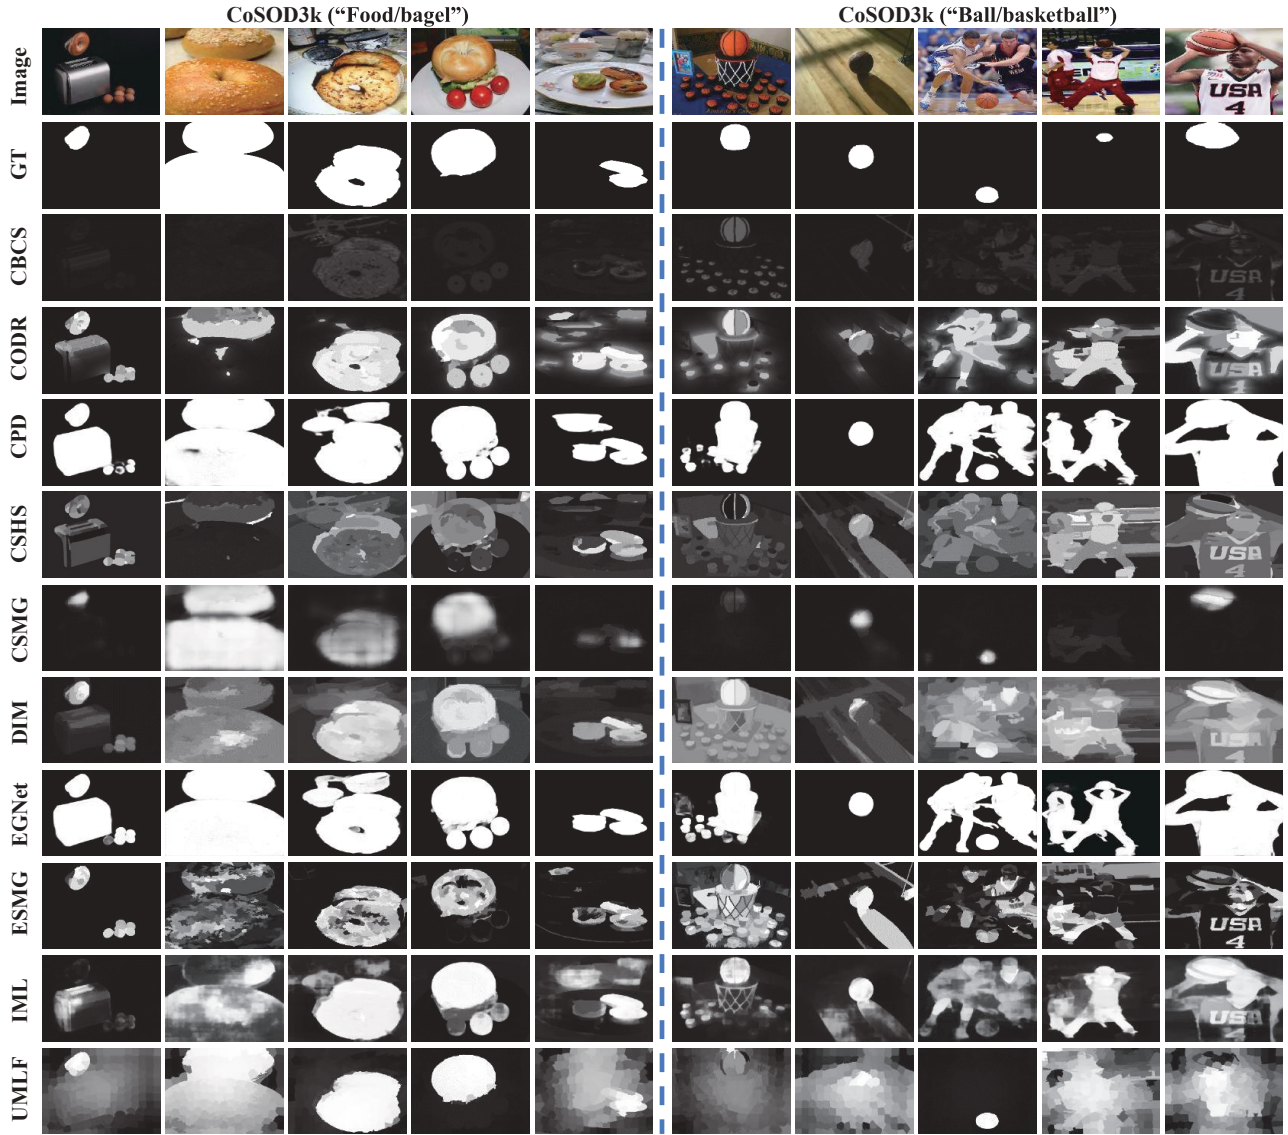

Figure 10: Qualitative examples of the top-10 existing models on *CoSOD3k*. From top to bottom, each row represents the original image group (Image), ground-truth (GT), EGNet [25], CPD [20], IML [16], CSMG [24], UMLF [9], CODR [21], DIM [22], CSHS [13], CBCS [8], and ESGM [12], respectively. Zoom-in for the best view (1/5).

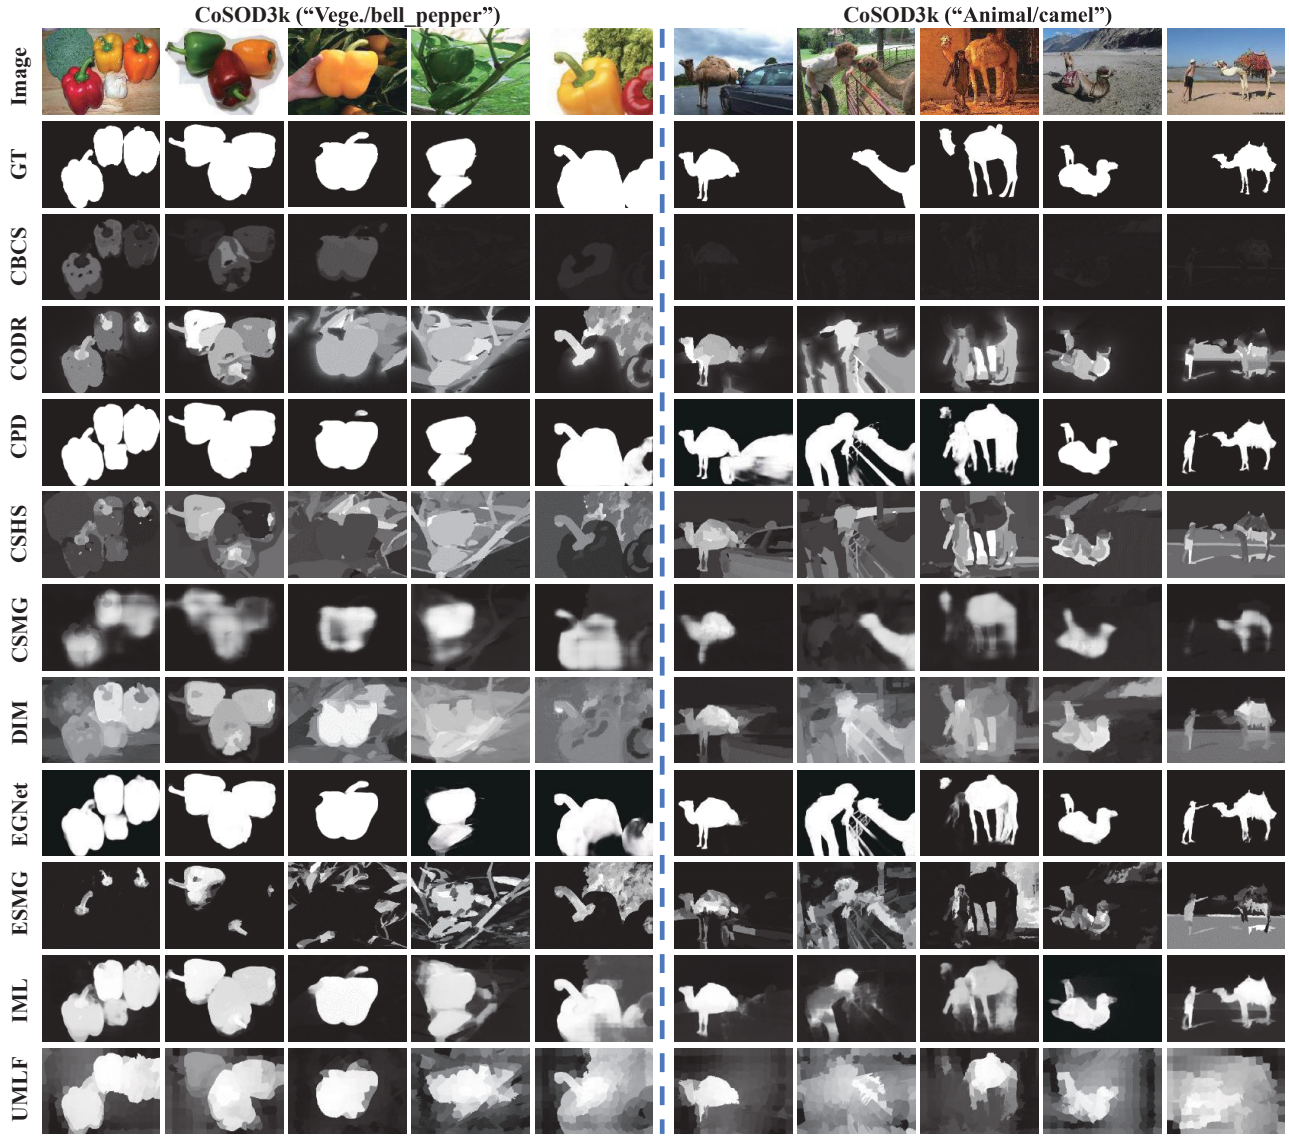

Figure 11: Qualitative examples of the top-10 existing models on *CoSOD3k*. From top to bottom, each row represents the original image group (Image), ground-truth (GT), EGNet [25], CPD [20], IML [16], CSMG [24], UMLF [9], CODR [21], DIM [22], CSHS [13], CBCS [8], and ESGM [12], respectively. Zoom-in for the best view (2/5).

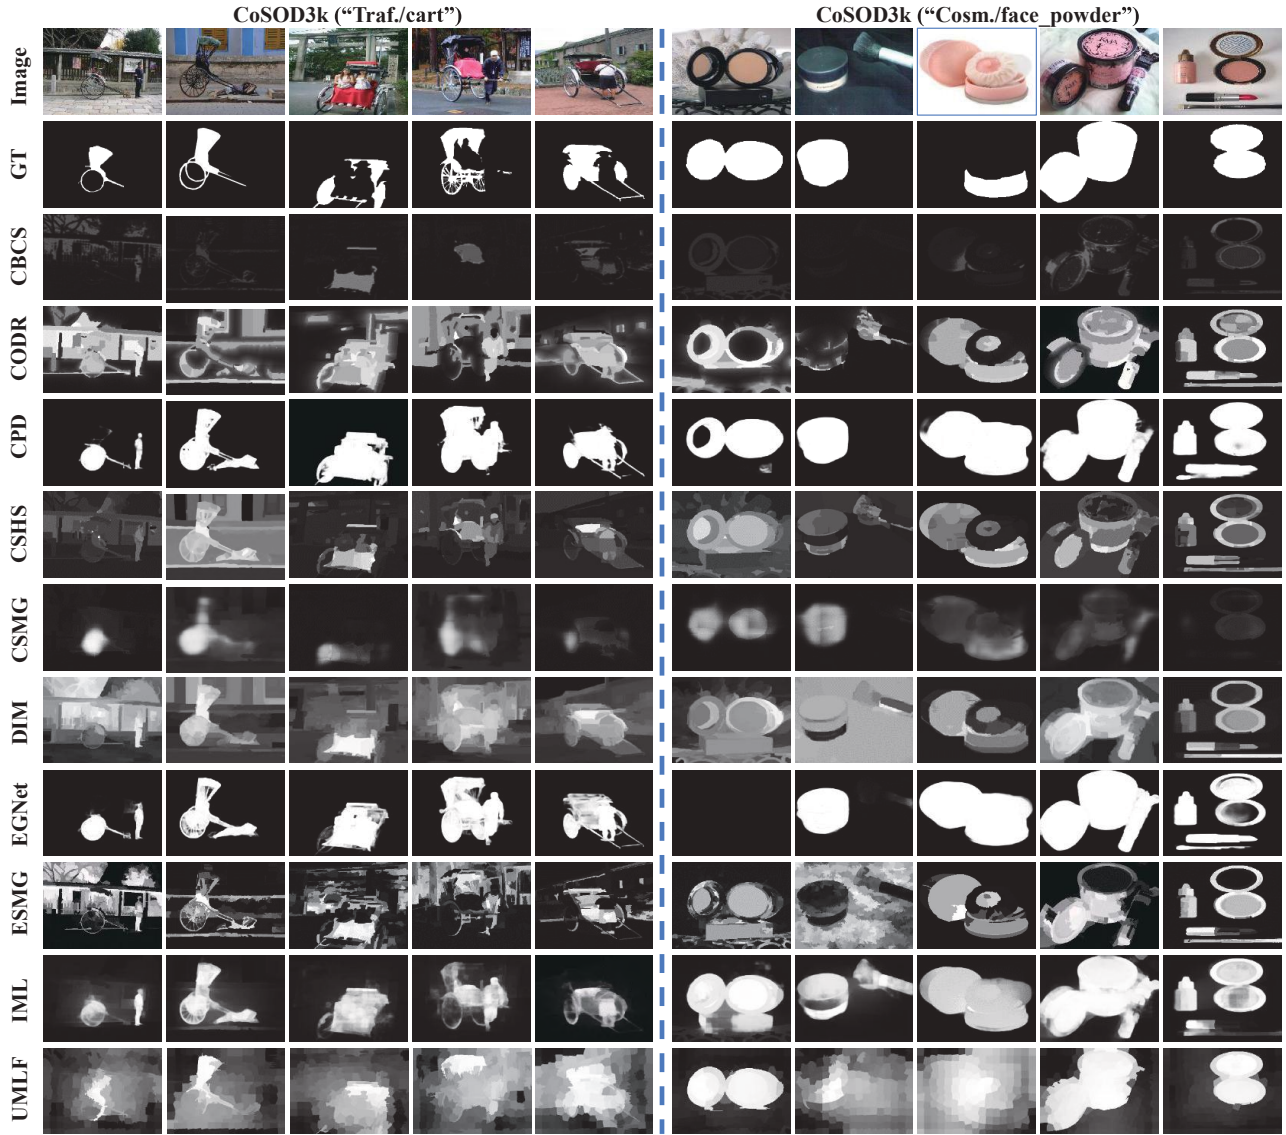

Figure 12: Qualitative examples of the top-10 existing models on *CoSOD3k*. From top to bottom, each row represents the original image group (Image), ground-truth (GT), EGNet [25], CPD [20], IML [16], CSMG [24], UMLF [9], CODR [21], DIM [22], CSHS [13], CBCS [8], and ESGM [12], respectively. Zoom-in for the best view (3/5).



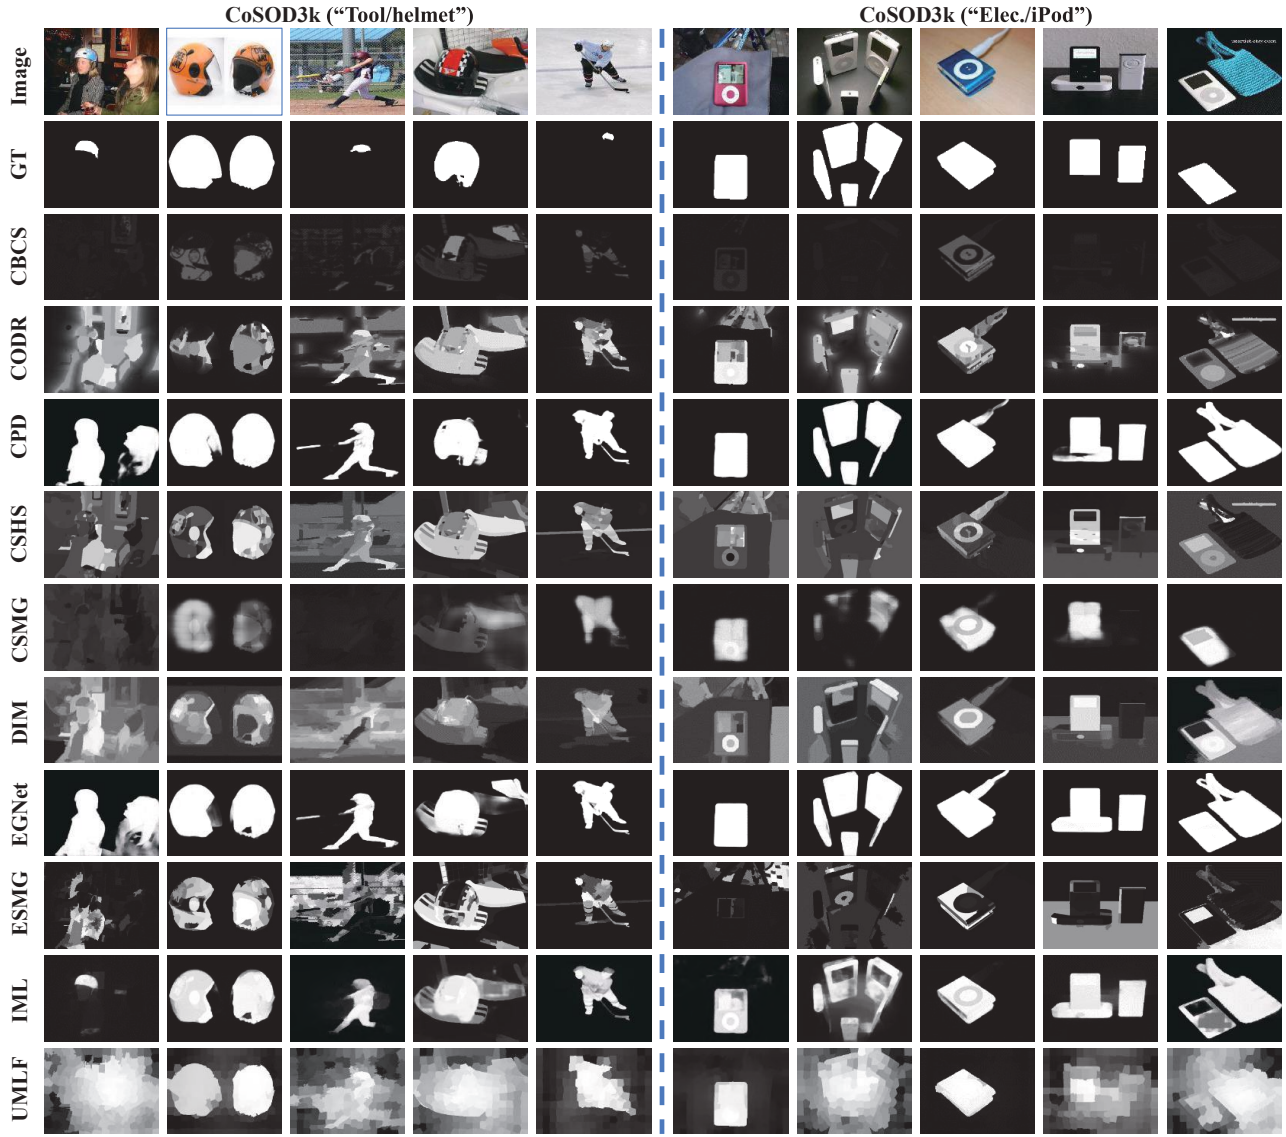

Figure 13: Qualitative examples of the top-10 existing models on *CoSOD3k*. From top to bottom, each row represents the original image group (Image), ground-truth (GT), EGNet [25], CPD [20], IML [16], CSMG [24], UMLF [9], CODR [21], DIM [22], CSHS [13], CBCS [8], and ESGM [12], respectively. Zoom-in for the best view (4/5).

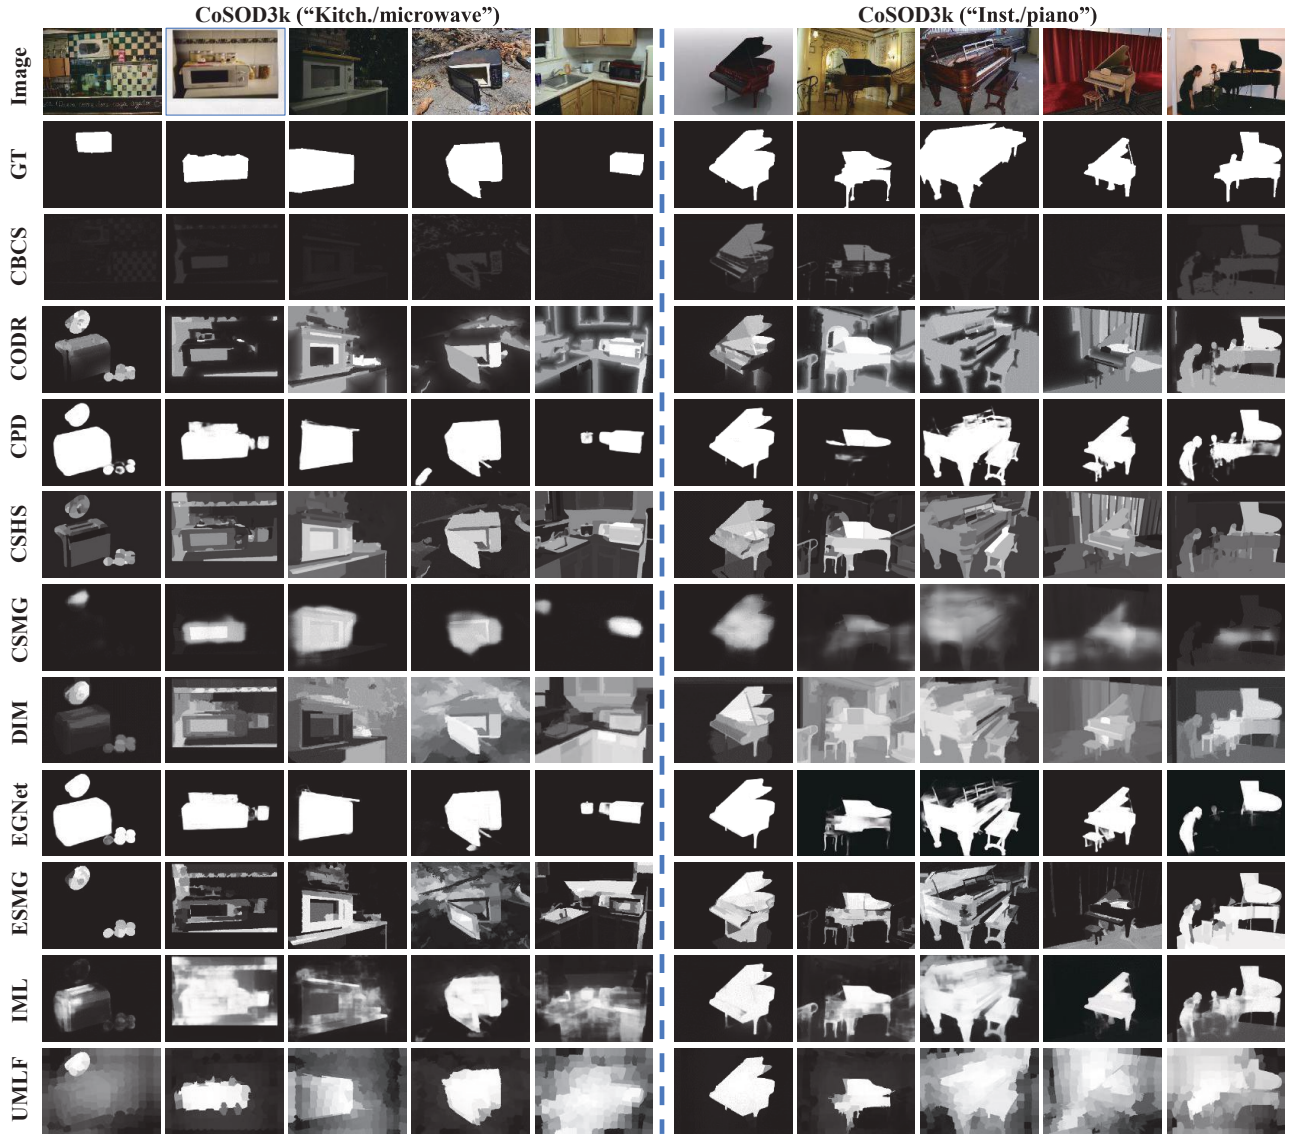

Figure 14: Qualitative examples of the top-10 existing models on *CoSOD3k*. From top to bottom, each row represents the original image group (Image), ground-truth (GT), EGNet [25], CPD [20], IML [16], CSMG [24], UMLF [9], CODR [21], DIM [22], CSHS [13], CBCS [8], and ESGM [12], respectively. Zoom-in for the best view (5/5).

## References

- [1] Radhakrishna Achanta, Sheila Hemami, Francisco Estrada, and Sabine Süsstrunk. Frequency-tuned salient region detection. In *IEEE CVPR*, number CONF, pages 1597–1604, 2009. 1, 2
- [2] Dhruv Batra, Adarsh Kowdle, Devi Parikh, Jiebo Luo, and Tsuhan Chen. icoseg: Interactive co-segmentation with intelligent scribble guidance. In *IEEE CVPR*, pages 3169–3176, 2010. 1
- [3] Ali Borji, Ming-Ming Cheng, Huaizu Jiang, and Jia Li. Salient object detection: A benchmark. *IEEE TIP*, 24(12):5706–5722, 2015. 1, 2
- [4] Xiaochun Cao, Zhiqiang Tao, Bao Zhang, Huazhu Fu, and Wei Feng. Self-adaptively weighted co-saliency detection via rank constraint. *IEEE TIP*, 23(9):4175–4186, 2014. 1
- [5] Deng-Ping Fan, Ming-Ming Cheng, Yun Liu, Tao Li, and Ali Borji. Structure-measure: A New Way to Evaluate Foreground Maps. In *IEEE ICCV*, pages 4548–4557, 2017. 1, 2, 3, 4, 5
- [6] Deng-Ping Fan, Cheng Gong, Yang Cao, Bo Ren, Ming-Ming Cheng, and Ali Borji. Enhanced-alignment Measure for Binary Foreground Map Evaluation. In *IJCAI*, pages 698–704, 2018. 1, 2
- [7] Deng-Ping Fan, Zheng Lin, Jia-Xing Zhao, Yun Liu, Zhao Zhang, Qibin Hou, Menglong Zhu, and Ming-Ming Cheng. Rethinking RGB-D salient object detection: Models, datasets, and large-scale benchmarks. *arXiv preprint arXiv:1907.06781*, 2019. 1
- [8] Huazhu Fu, Xiaochun Cao, and Zhuowen Tu. Cluster-based co-saliency detection. *IEEE TIP*, 22(10):3766–3778, 2013. 3, 4, 5, 11, 12, 13, 14, 15
- [9] Junwei Han, Gong Cheng, Zhenpeng Li, and Dingwen Zhang. A unified metric learning-based framework for co-saliency detection. *IEEE TCSVT*, 28(10):2473–2483, 2017. 3, 4, 5, 11, 12, 13, 14, 15
- [10] Bo Li, Zhengxing Sun, Quan Wang, and Qian Li. Co-saliency detection based on hierarchical consistency. In *ACM MM*, pages 1392–1400, 2019. 1
- [11] Hongliang Li and King Ng Ngan. A co-saliency model of image pairs. *IEEE TIP*, 20(12):3365–3375, 2011. 1
- [12] Yijun Li, Keren Fu, Zhi Liu, and Jie Yang. Efficient saliency-model-guided visual co-saliency detection. *IEEE SPL*, 22(5):588–592, 2014. 3, 4, 5, 11, 12, 13, 14, 15
- [13] Zhi Liu, Wenbin Zou, Lina Li, Liquan Shen, and Olivier Le Meur. Co-saliency detection based on hierarchical segmentation. *IEEE SPL*, 21(1):88–92, 2013. 3, 4, 5, 11, 12, 13, 14, 15
- [14] Ran Margolin, Lihi Zelnik-Manor, and Ayellet Tal. How to evaluate foreground maps? In *IEEE CVPR*, pages 248–255, 2014. 1
- [15] Federico Perazzi, Philipp Krähenbühl, Yael Pritch, and Alexander Hornung. Saliency filters: Contrast based filtering for salient region detection. In *CVPR*, pages 733–740, 2012. 1, 2
- [16] Jingru Ren, Zhi Liu, Xiaofei Zhou, Cong Bai, and Guangling Sun. Co-saliency detection via integration of multi-layer convolutional features and inter-image propagation. *Neuro-computing*, 2019. 3, 4, 5, 11, 12, 13, 14, 15
- [17] Chung-Chi Tsai, Weizhi Li, Kuang-Jui Hsu, Xiaoning Qian, and Yen-Yu Lin. Image co-saliency detection and co-segmentation via progressive joint optimization. *IEEE TIP*, 28(1):56–71, 2018. 1
- [18] Lina Wei, Shanshan Zhao, Omar El Farouk Bourahla, Xi Li, Fei Wu, and Yueting Zhuang. Deep group-wise fully convolutional network for co-saliency detection with graph propagation. *IEEE TIP*, 2019. 1
- [19] John Winn, Antonio Criminisi, and Tom Minka. Object categorization by learned universal visual dictionary. In *IEEE ICCV*, pages 1800–1807, 2005. 1
- [20] Zhe Wu, Li Su, and Qingming Huang. Cascaded partial decoder for fast and accurate salient object detection. In *IEEE CVPR*, pages 3907–3916, 2019. 3, 4, 5, 11, 12, 13, 14, 15
- [21] Linwei Ye, Zhi Liu, Junhao Li, Wan-Lei Zhao, and Liquan Shen. Co-saliency detection via co-salient object discovery and recovery. *IEEE SPL*, 22(11):2073–2077, 2015. 3, 4, 5, 11, 12, 13, 14, 15
- [22] Dingwen Zhang, Junwei Han, Jungong Han, and Ling Shao. Cosaliency detection based on intrasaliency prior transfer and deep intersaliency mining. *IEEE TNNLS*, 27(6):1163–1176, 2015. 3, 4, 5, 11, 12, 13, 14, 15
- [23] Dingwen Zhang, Junwei Han, Chao Li, and Jingdong Wang. Co-saliency detection via looking deep and wide. In *IEEE CVPR*, pages 2994–3002, 2015. 1
- [24] Kaihua Zhang, Tengpeng Li, Bo Liu, and Qingshan Liu. Co-saliency detection via mask-guided fully convolutional networks with multi-scale label smoothing. In *CVPR*, pages 3095–3104, 2019. 3, 4, 5, 11, 12, 13, 14, 15
- [25] Jia-Xing Zhao, Jiang-Jiang Liu, Deng-Ping Fan, Yang Cao, Jufeng Yang, and Ming-Ming Cheng. Egnet: Edge guidance network for salient object detection. In *IEEE ICCV*, Oct 2019. 3, 4, 5, 11, 12, 13, 14, 15
